# Supplementary material
Source: PubMed Central journal article supplement (PMC6065162)
Supplement: supp_RA117.000703_133547_2_supp_148636_p9tcx3.pdf [file supp_RA117.000703_133547_2_supp_148636_p9tcx3.pdf]

# Supporting Information

## ***Trib1* deficiency modulates function and polarization of bone marrow derived macrophages**

Lilli Arndt\*, Janine Dokas\*, Martin Gericke<sup>#</sup>, Carl Elias Kutzner\*, Silvana Müller\*, Franziska Jeromin\*, Joachim Thiery\*<sup>+</sup>, Ralph Burkhardt\*<sup>+</sup>

From the \*Institute of Laboratory Medicine, Clinical Chemistry and Molecular Diagnostics, University Hospital Leipzig, 04103 Leipzig, Germany, <sup>#</sup>Institute of Anatomy, University of Leipzig, 04103 Leipzig, Germany and the <sup>+</sup>LIFE-Leipzig Research Center for Civilization Diseases, University of Leipzig, 04103 Leipzig, Germany

### **List of supplemental material:**

- Figure S1
- Figure S2
- Figure S3
- Figure S4
- Figure S5
- Figure S6
- Figure S7
- Table S1

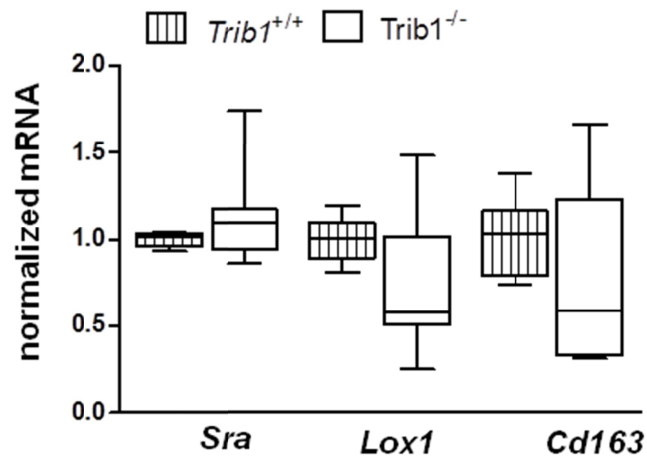

**Figure S1: Gene expression of *Sra*, *Lox1* and *Cd163* is comparable in WT and *Trib1*<sup>-/-</sup> BMDMs.** BMDMs from WT and *Trib1*<sup>-/-</sup> mice were analyzed for mRNA expression of the scavenger receptors *Sra*, *Lox1* and *Cd163* by qPCR using the  $\Delta$ Ct method and *Actb* as a housekeeping gene. Values are expressed as changes compared to control group.

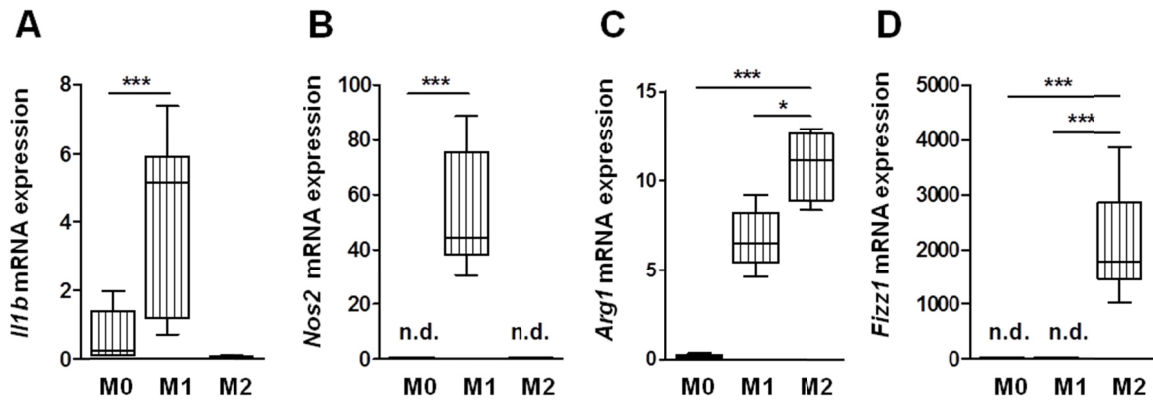

**Figure S2: M1 and M2 marker gene expression of BMDMs in response to LPS/IFN $\gamma$  or IL-4 treatment.**

To validate the M1 or M2 polarization of macrophages, BMDMs from WT mice were treated with LPS (100ng/ml)/ IFN $\gamma$  (20 ng/ml) for M1 or IL-4 (20 ng/ml) for M2 activation for 48h. RNA was isolated and M1 (*I1b*, *Nos2*) and M2 (*Arg1*, *Fizz1*) marker gene expression was measured by qPCR using the  $\Delta Ct$  method and *Actb* as housekeeping gene; values are expressed as arbitrary units ( $2^{-\Delta Ct} \times 1000$ ). (\*\*\*) $p < 0.001$

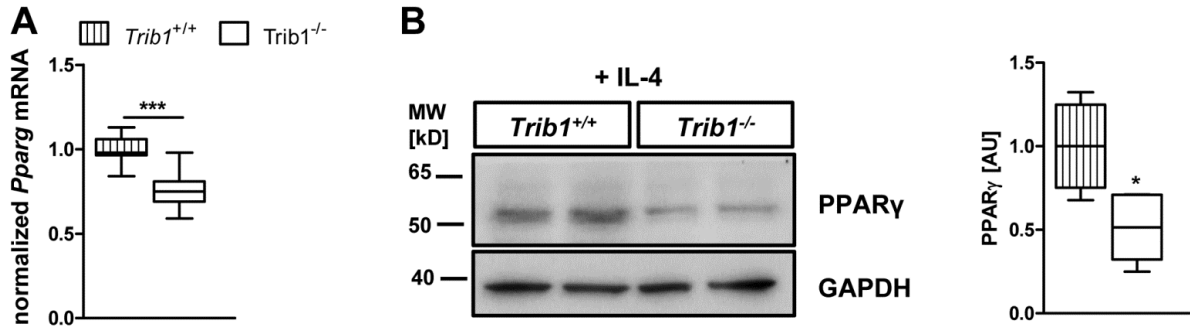

**Figure S3: *Trib1* deficient BMDMs show lower levels of PPAR $\gamma$  mRNA and protein after IL-4 treatment.**

For M2 polarization WT and *Trib1*<sup>-/-</sup> BMDMs were treated with IL-4 (20 ng/ml) for 48h. RNA was isolated and *Pparg* gene expression was measured by qPCR using the  $\Delta$ Ct method and *Actb* as housekeeping gene; values are expressed as changes compared to control group [A]. Whole cell lysates were prepared using RIPA lysis buffer and analyzed by immunoblotting using anti-PPAR $\gamma$  and anti-GAPDH antibodies [B]. Densitometric analysis was performed using the ImageJ software and is shown next to the blot; values are expressed as changes compared to control group (mean  $\pm$  SD in arbitrary units (AU)). The striped column represents WT and the solid white column *Trib1*-deficient BMDMs. (\*\*\*) $p < 0.001$

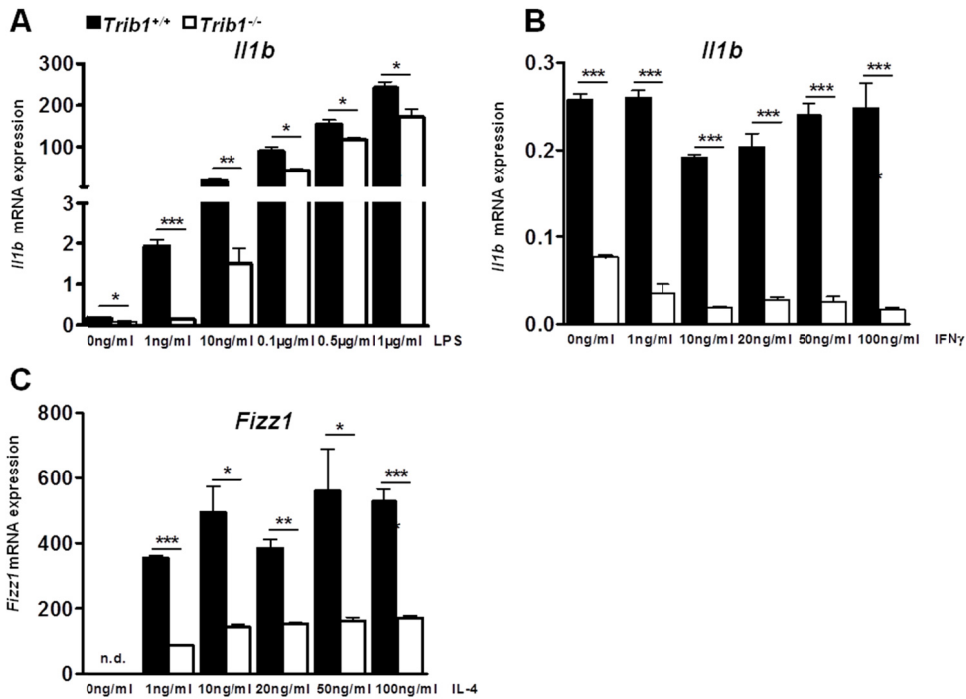

**Figure S4: *Trib1*<sup>-/-</sup> BMDMs retain lower expression of *Il1b* and *Fizz1* in response to increasing concentration of LPS, IFN $\gamma$  or IL-4.**

WT and *Trib1*<sup>-/-</sup> BMDMs were stimulated either with LPS in a concentration range from 1ng/ml to 1μg/ml [A], or IFN $\gamma$  from 1ng/ml to 100ng/ml [B] or IL-4 from 1ng/ml to 100ng/ml [C] over 48h. RNA was isolated and *Il1b* and *Fizz1* gene expression was measured by qPCR using the  $\Delta$ Ct method and *Actb* as housekeeping gene; values are expressed as arbitrary units ( $2^{-\Delta Ct} \times 1000$ ). The striped column represents WT and the solid white column *Trib1*-deficient BMDMs. (\*p<0.05, \*\*p<0.01, \*\*\*p<0.001, n.d. = not detectable)

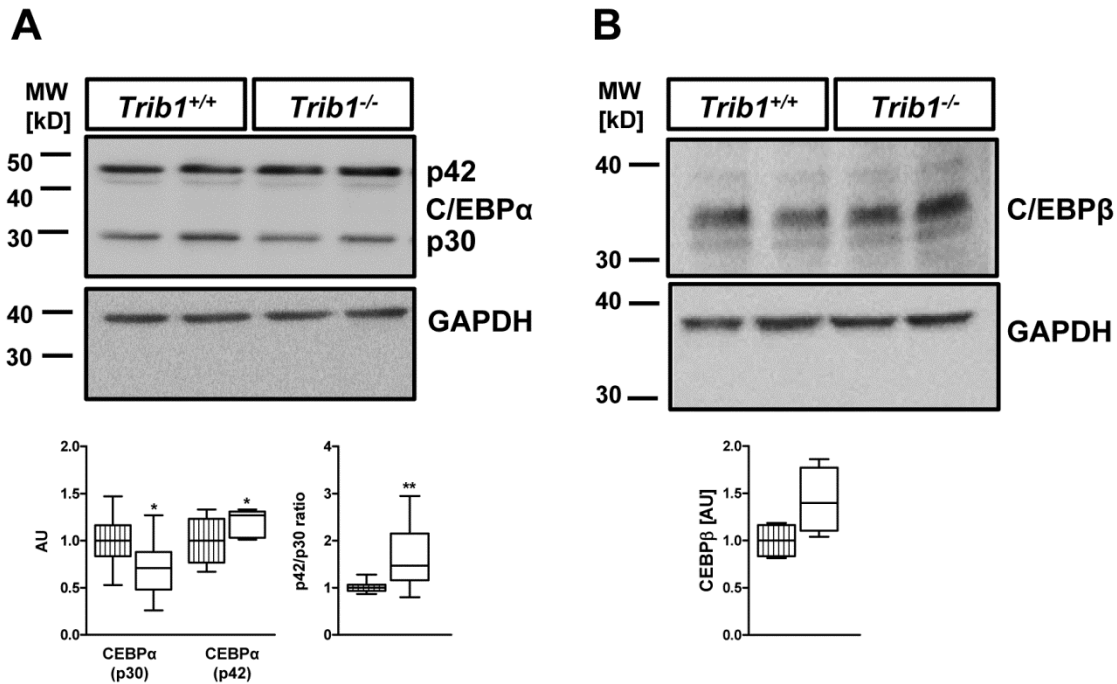

**Figure S5: Protein abundance of C/EBP $\alpha$  is increased in *Trib1*<sup>-/-</sup> BMDMs.**

Whole cell extracts from WT and *Trib1*<sup>-/-</sup> BMDMs were isolated using RIPA buffer and analyzed by immunoblotting. WT and *Trib1*<sup>-/-</sup> lysates were probed with antibodies against C/EBP $\alpha$  [A] and C/EBP $\beta$  [B] and GAPDH as loading control. Densitometric analysis was performed using the ImageJ software and is shown below each immunoblot; values are expressed as changes compared to control group (mean  $\pm$  SD in arbitrary units (AU)). A representative blot from three independent experiments is presented for each protein. The striped column represents WT and the solid white column *Trib1*-deficient BMDMs. (\* $p$ <0.05, \*\* $p$ <0.01)

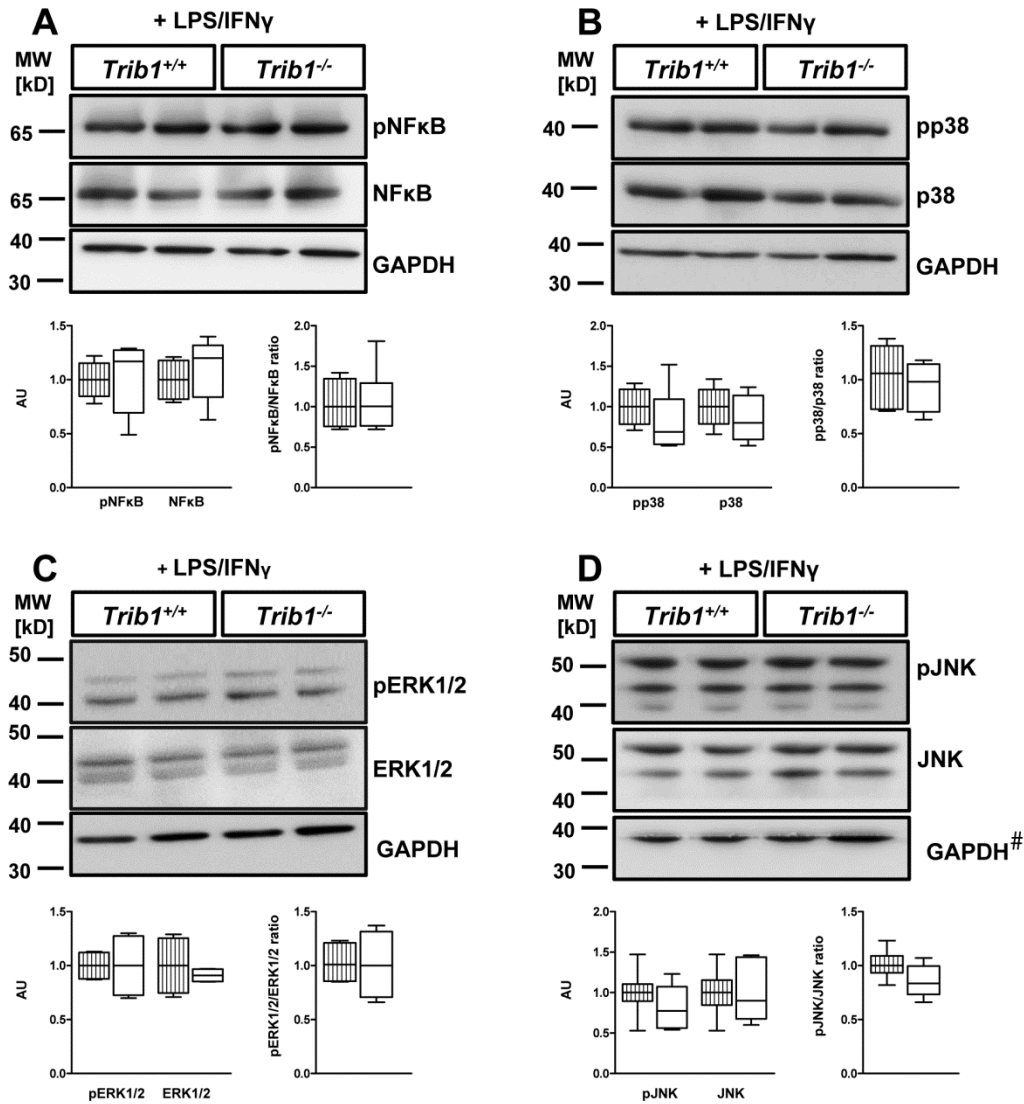

**Figure S6: NFκB and MAPK signaling in response to LPS/ IFN $\gamma$  treatment is not altered in *Trib1*<sup>-/-</sup> BMDMs.**

BMDMs from WT and *Trib1*<sup>-/-</sup> mice were treated with LPS (100ng/ml)/ IFN $\gamma$  (20 ng/ml) for 30 min to initiate M1 polarization. Total cell lysates were prepared and analyzed by immunoblotting. Abundance of total and phosphorylated protein was determined for NFκB [A], p38 [B], ERK1/2 [C] and JNK [D]. An antibody against GAPDH was used as loading control. # The GAPDH loading control in Figure S6D is identical with the GAPDH loading control for JAK1 in Figure 4D, as both western blots were created from the same membrane (upper part of the cut membrane was probed with JAK1).

Densitometric analysis was performed using the ImageJ software and is shown below each immunoblot; values are expressed as changes compared to control group (mean  $\pm$  SD in arbitrary units (AU)). A representative blot from two to three independent experiments is presented for each protein. The striped column represents WT and the solid white column *Trib1*-deficient BMDMs.

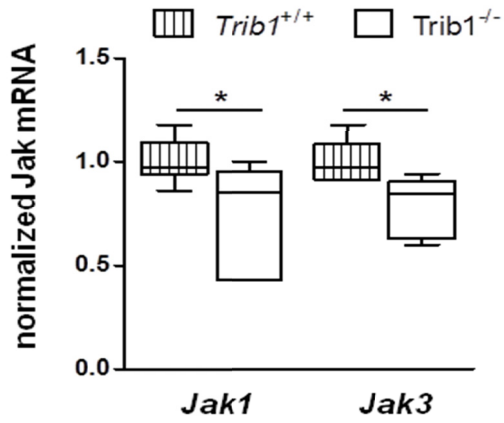

**Figure S7: *Jak1* and *Jak3* gene expression is reduced in *Trib1*<sup>-/-</sup> BMDMs.**

RNA from WT and *Trib1*<sup>-/-</sup> BMDMs was isolated and *Jak1* and *Jak3* gene expression was measured by qPCR using the  $\Delta$ Ct method and *Actb* as housekeeping gene; values are expressed as changes compared to control group. (\*p<0.05)



**Table S1: List of primers for quantitative RT-PCR**

| <b>Gene name</b> | <b>Forward primer (5' - 3')</b> | <b>Reverse primer (5' - 3')</b> |
|------------------|---------------------------------|---------------------------------|
| <i>Il6</i>       | TCCAGTTGCCTTCTTGGGAC            | GTGTAATTAAGCCTCCGACTTG          |
| <i>Il1b</i>      | TGCCACCTTTTGACAGTGATG           | TGATGTGCTGCTGCGAGATT            |
| <i>Nos2</i>      | ACCTTGTTTACAGCTACGCCTT          | CATTCCCAAATGTGCTTGT             |
| <i>Arg1</i>      | ACAAGACAGGGCTCCTTTTTCAG         | GGCTTATGGTTACCCTCCCG            |
| <i>Cd206</i>     | CAGGTGTGGGCTCAGGTAGT            | TGTGGTGAGCTGAAAGGTGA            |
| <i>Fizz1</i>     | GGAACTTCTTGCCAATCCAG            | GCCACAAGCACACCCAGTAG            |
| <i>Cd68</i>      | AGCTGCCTGACAAGGGACACT           | AGGAGGACCAGGCCAATGAT            |
| <i>Cd36</i>      | TGGTGATGTTTGTGCTTTTATGAT        | GCTCATCCACTACTTATTTTCCATTCT     |
| <i>Srb1</i>      | CCCTCCCTCATCAAGCAGC             | GAACTCCCTGTAGACATAGGGTC         |
| <i>Scarfl</i>    | GGTGACAGTTTCTCATCACGATCCA       | AGGCTGGCTTCTGGTGACTC            |
| <i>Cxcl16</i>    | ACTGGCTTGAGGCAAATGTT            | GGTTCCAGTTGCAGTCCAAA            |
| <i>Stab1</i>     | CTTCTCCAACCCCTGCTACG            | CACAGCCACAGTCCTCCTG             |
| <i>Marco</i>     | CTGTGCGATGCTCGGTTAC             | TGCAGTCCCACAAACTGTTC            |
| <i>Ccr2</i>      | TCATAAAGGAGCCATACCTGTAAA        | GTATGCCGTGGATGAACTGA            |
| <i>Trib1</i>     | TAGCTGAGCGCGAGCATGTGT           | CGTTTTTCGGCTCCGCACATAGGA        |
| <i>Ppargl</i>    | CGCGGGCTGAGAAGTCACGTT           | GGTGGGCCAGAATGGCATCT            |
| <i>Actb</i>      | GTGCGTGACATCAAAGAG              | GCCACAGGATTCCATACC              |
| <i>Sra</i>       | CATGAACAAGAGGATGCTGACT          | GGAAGGGATGCTGTCATTGAA           |
| <i>Lox1</i>      | ATGAAGCCTGCGAATGACGA            | CTGGCGTAATTGTGTCCACTG           |
| <i>Cd163</i>     | GGTCATTTCAGAGGCACACTG           | CTGGCTGTCCTGTCAAGGCT            |
| <i>Jak1</i>      | ACGCTCCGAACCGAATCATC            | GTGCCAGTTGGTAAAGTAGAACC         |
| <i>Jak3</i>      | ACACCTCTGATCCCTCAGC             | GCGAATGATAAACAGGCAGGATG         |
